# Supplementary material for: Solvatomorphism and anion effects in predominantly low spin iron(iii) Schiff base complexes
Source: Royal Society of Chemistry journal article supplement (doi:10.1039/c8dt02016g), 2018-01-01
Supplement: c8dt02016g1.pdf [file c8dt02016g1.pdf]

## Supporting Information

### Solvatomorphism and anion effects in predominantly low spin iron(III) Schiff base complexes

Theerapoom Boonprab,<sup>a</sup> Phimpaka Harding,<sup>a</sup> Keith S. Murray,<sup>b</sup> Wasinee Phonsri,<sup>b</sup>  
Shane G. Telfer,<sup>c</sup> Adil Alkaş,<sup>c</sup> Rangsiman Ketkaew,<sup>d</sup> Yuthana Tantirungrotechai,<sup>d</sup>  
Guy N. L. Jameson<sup>e</sup> and David J. Harding<sup>a\*</sup>

*E-mail: hdavid@mail.wu.ac.th*

<sup>a</sup> *Functional Materials and Nanotechnology Centre of Excellence (FuNTech), Walailak University, Thasala, Nakhon Si Thammarat, 80160, Thailand.*

<sup>b</sup> *School of Chemistry, Monash University, Clayton, Melbourne, Victoria, 3800, Australia.*

<sup>c</sup> *MacDiarmid Institute for Advanced Materials and Nanotechnology, Institute of Fundamental Sciences, Massey University, Palmerston North, New Zealand*

<sup>d</sup> *Computational Chemistry Research Unit, Department of Chemistry, Faculty of Science and Technology, Thammasat University, Pathum Thani, 12120 Thailand.*

<sup>e</sup> *School of Chemistry, Bio21 Molecular Science and Biotechnology Institute, 30 Flemington Road, The University of Melbourne, Parkville, Victoria 3010, Australia.*

## Contents

|                                                    |   |
|----------------------------------------------------|---|
| <sup>1</sup> H NMR and IR spectra of HnaphEen..... | 2 |
| IR spectra of <b>1-4</b> .....                     | 3 |
| TGA studies of [Fe(naphEen) <sub>2</sub> ]F.....   | 5 |
| Crystal packing figures.....                       | 5 |
| Mössbauer spectroscopic studies.....               | 7 |

## NMR and IR spectra of HnaphEen and [Fe(naphEen)<sub>2</sub>]halide

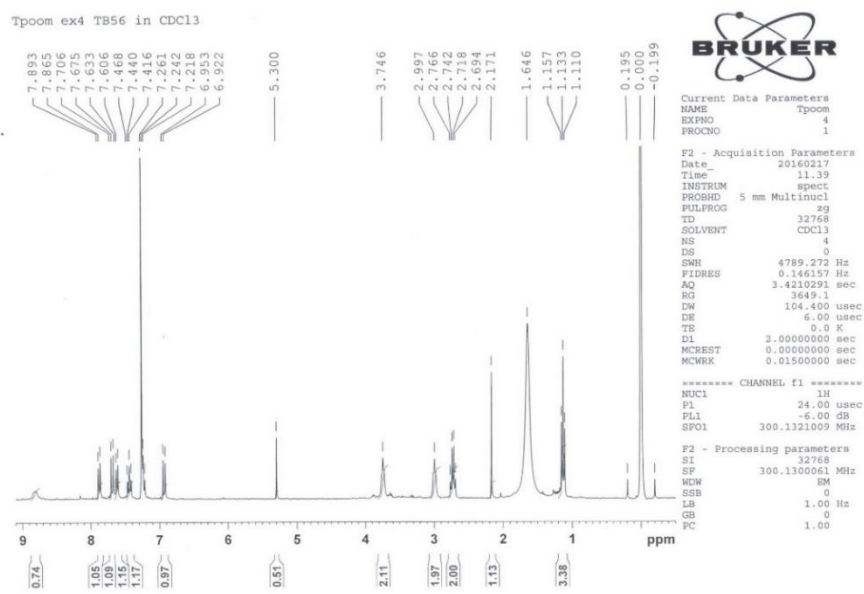

Figure S1 <sup>1</sup>H NMR spectrum of HnaphEen. Note that the peak 1.65 ppm is due to water.

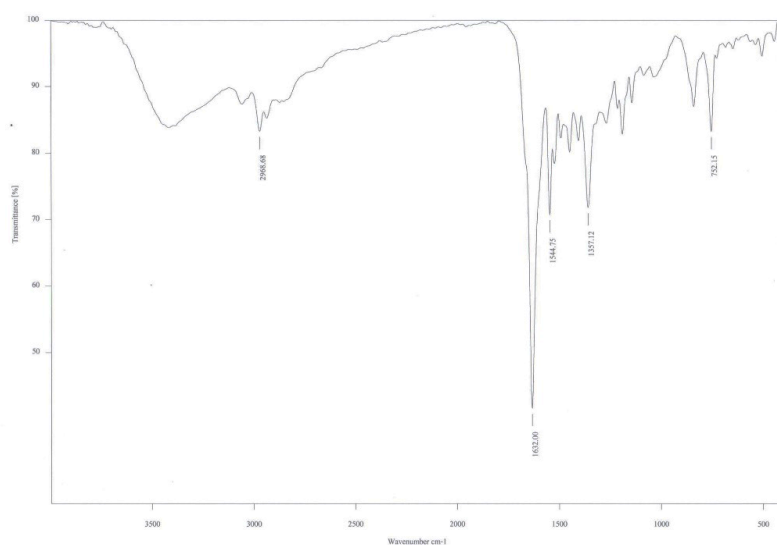

Figure S2 IR spectrum of HnaphEen.

F

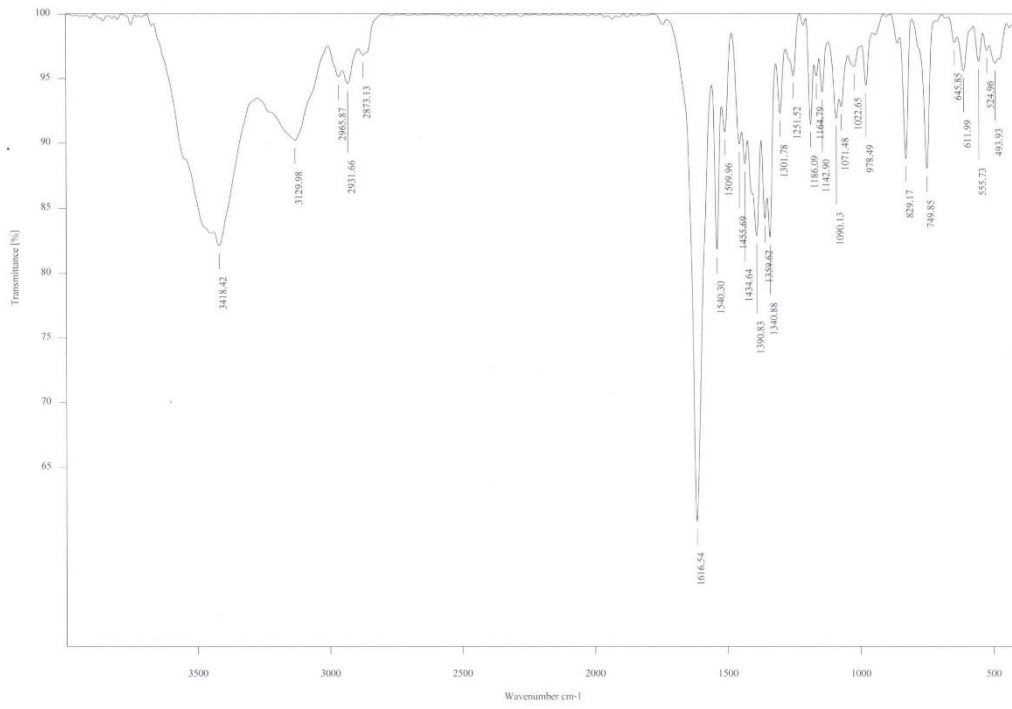

Cl

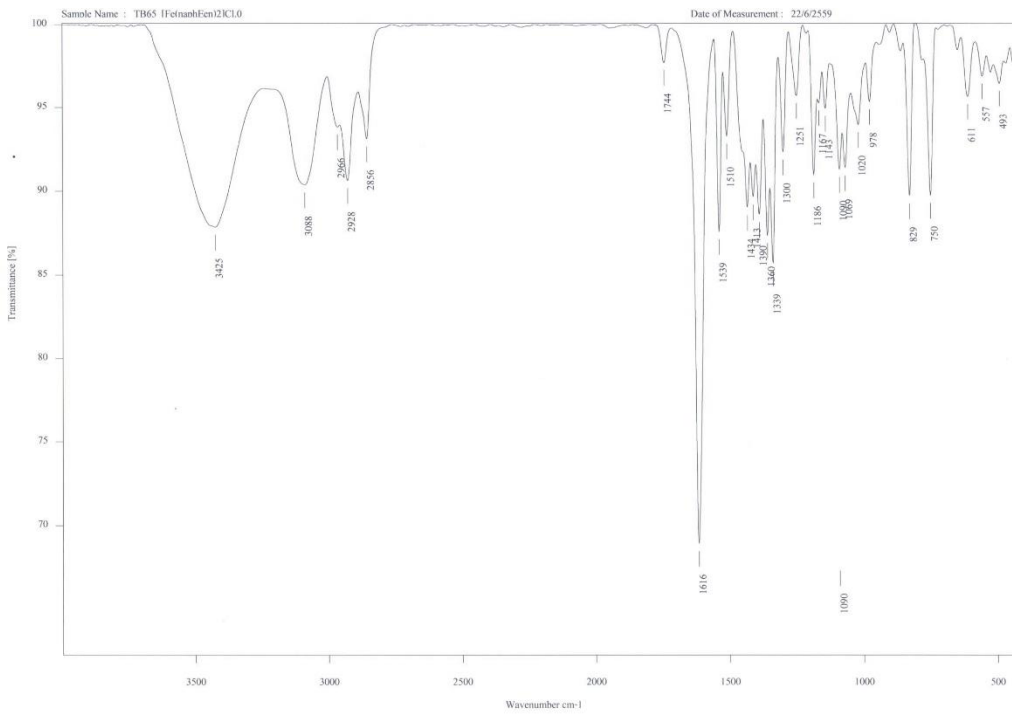

Br

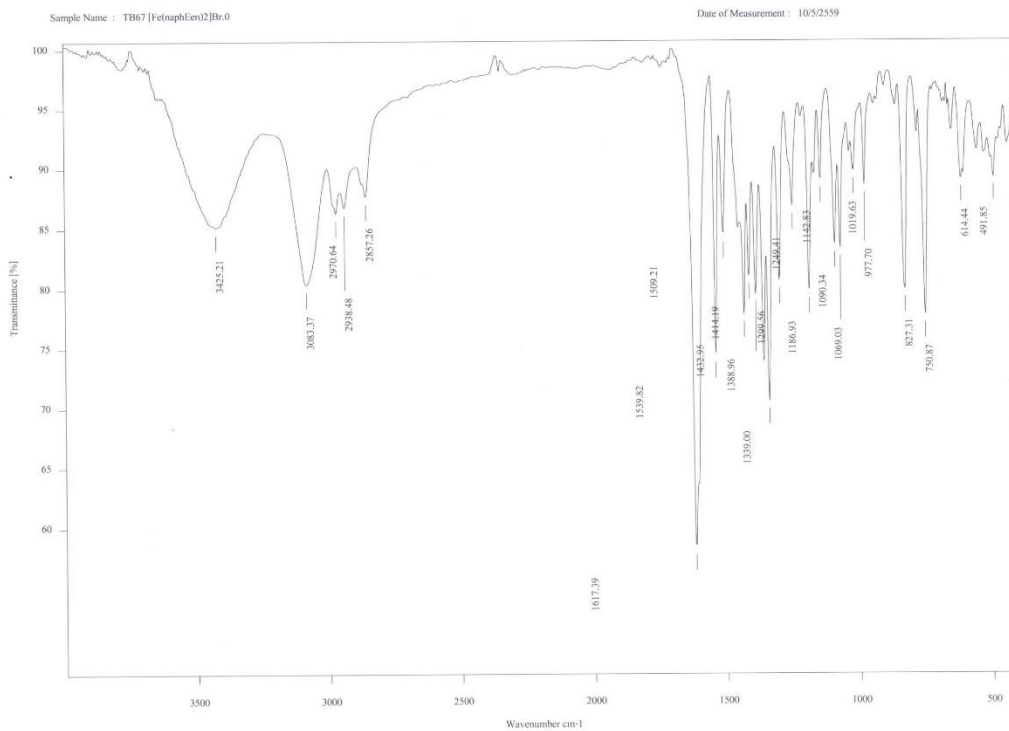

I

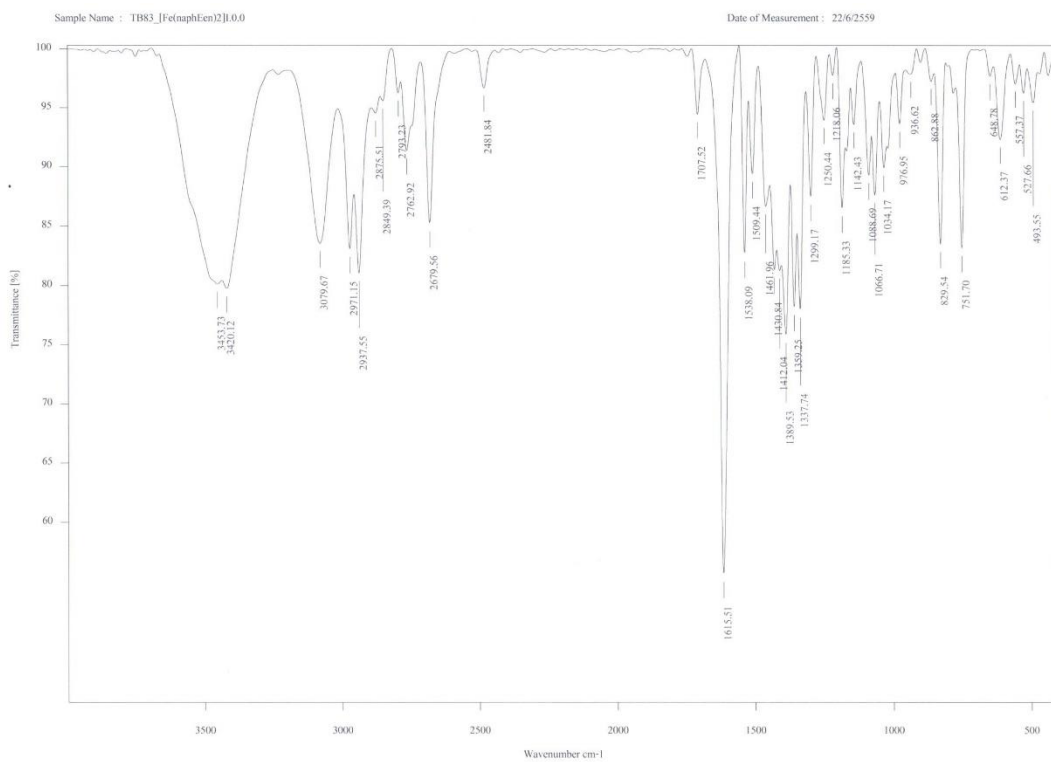

Figure S3 IR spectra of [Fe(naphEen)<sub>2</sub>]halide.

## TGA Studies of $[\text{Fe}(\text{naphEen})_2]\text{F}$

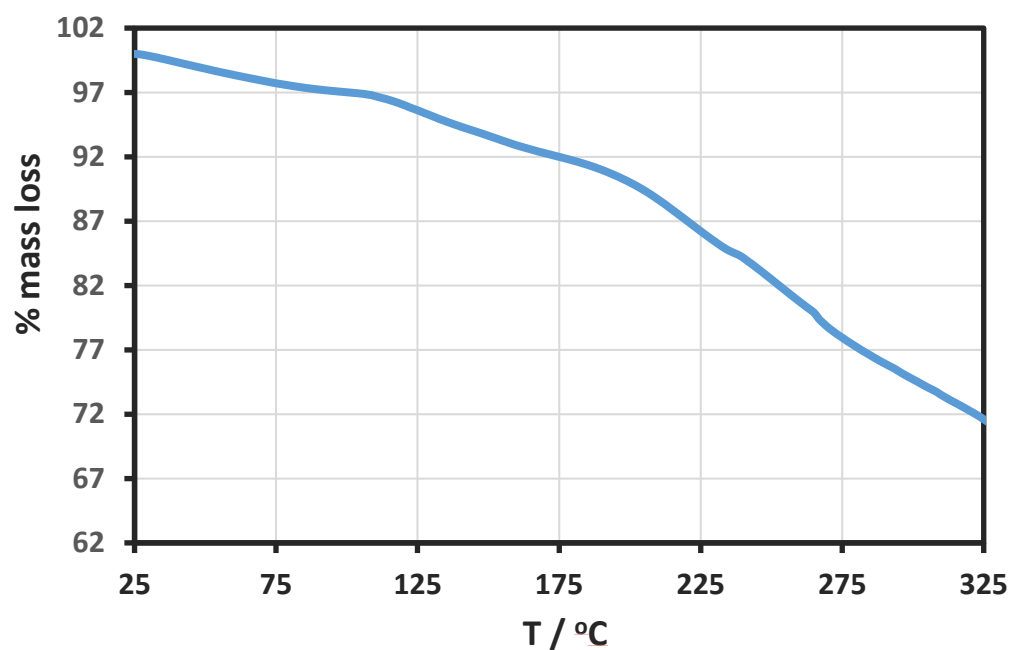

Figure S4 TGA analysis of  $[\text{Fe}(\text{naphEen})_2]\text{F}$ .

## Crystal Packing

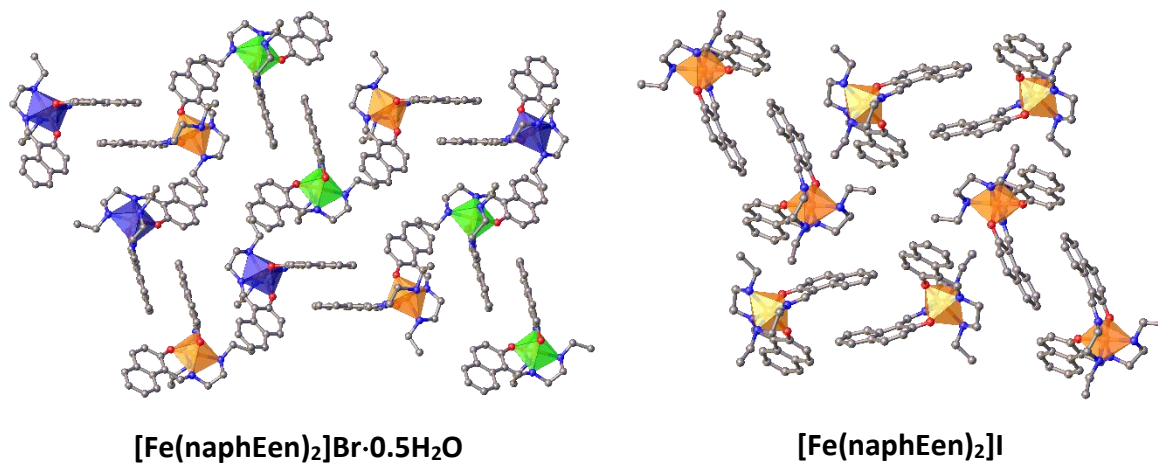

Figure S5 View of the supramolecular squares in **3** and **4** at 293 K. In the case of **3** the Fe1, Fe2 and Fe3 centres are coloured orange, purple and green, respectively.

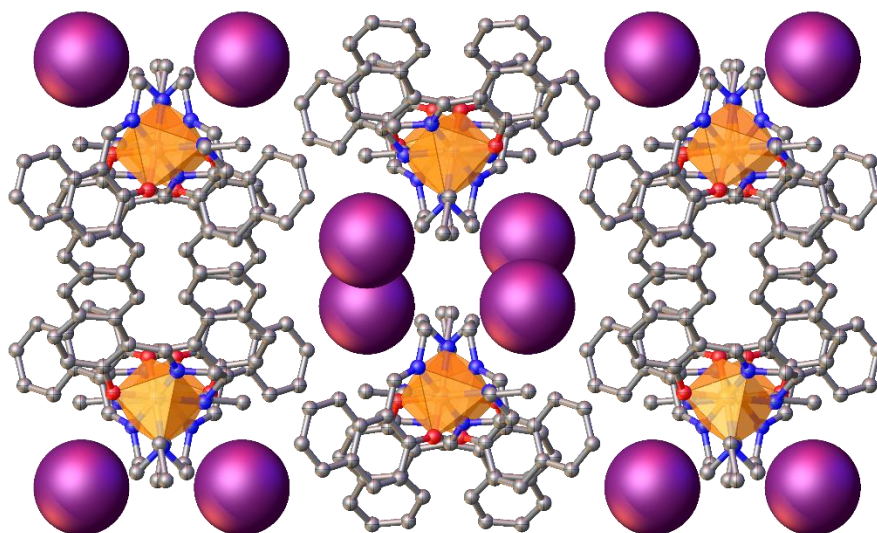

**Figure S6** View of the 'Butterfly' motif in  $[\text{Fe}(\text{naphEen})_2]\text{I}$  **4** viewed down the  $a$  axis.

**Table S1** Summary of the supramolecular contacts in  $[\text{Fe}(\text{naphEen})_2]\text{Cl}\cdot\text{H}_2\text{O}$  **2** and  $[\text{Fe}(\text{naphEen})_2]\text{Br}\cdot\text{H}_2\text{O}$  **3** that make up the Fe squares.

|               | <b>2-123 K</b>                                   | <b>3-123 K</b>                                  | <b>3-293 K</b>                |
|---------------|--------------------------------------------------|-------------------------------------------------|-------------------------------|
| <b>Fe1</b>    |                                                  |                                                 | <b>Fe1-Fe2</b>                |
| C-H... $\pi$  | 2.831(3) {H27B...Cg (C9-C10)}                    | 2.861(4) {H27A...Cg (C9-C10)}                   | 2.86(3) (H52...C18)           |
| $\pi$ - $\pi$ | 3.253(6) (plane-to-plane)<br>3.731(4) (Cg ...Cg) | 3.283(9) (plane-to-plane)<br>3.782(6) (Cg...Cg) | 3.19(4) (C22...C37)           |
| <b>Fe2</b>    |                                                  |                                                 | <b>Fe-3</b>                   |
| C-H...O       | 2.638(4) (H39...O4)                              | 2.672(5) (H39...O4)                             | -                             |
| C-H... $\pi$  | 2.694(6) (H55...C32)                             | 2.689(8) (H55...C32)                            | 2.781(15) {H90B...Cg (C1-C6)} |
| C-H... $\pi$  | 2.769(4) {H27B...Cg (C35-C40)}                   | 2.810(5) {H27B...Cg (C35-C40)}                  | 2.79(1) {H87B...Cg (C35-C40)} |
| C-H... $\pi$  | -                                                | -                                               | 2.82(2) (H82...C33)           |
| $\pi$ - $\pi$ | -                                                | -                                               | 3.16(6) {C67...C67*}          |

**Table S2** Summary of the supramolecular contacts in [Fe(naphEen)<sub>2</sub>]I **4** that make up the Fe squares.

| <b>4-293 K</b> |                                                 |
|----------------|-------------------------------------------------|
| <b>Fe1</b>     |                                                 |
| C-H... $\pi$   | 2.84(3) (H23... C2)<br>2.707(9) (H30B...Cg)     |
| $\pi$ - $\pi$  | 3.30(3) (plane-to-plane)<br>4.366(17) (Cg...Cg) |
| C-H...I        | 3.089(2) (H18 ...I1)                            |

### Mössbauer spectroscopic studies

**Table S3** <sup>57</sup>Fe Mössbauer spectral properties of **1**.

| T (K) | State | $\delta$ (mm/s) | $\Delta E_Q$ (mm/s) | B (T) | $\Gamma_L$ (mm/s) | $\Gamma_R$ (mm/s) | I (%) |
|-------|-------|-----------------|---------------------|-------|-------------------|-------------------|-------|
| 291   | HS    | 0.39            | 0.71                | -     | 0.50              | 0.53              | 71    |
|       | LS    | 0.16            | 2.70                | -     | 0.49              | 0.42              | 29    |
| 5.1   | HS    | 0.51            | 0.69                | -     | 0.56              | 0.57              | 36    |
|       | HS2   | 0.50            | -                   | 48    | 0.70              | 0.70              | 20    |
|       | LS    | 0.22            | 2.79                |       | 0.61              | 0.44              | 44    |
